# Supplementary figures and images for: Effect of Bauhinia monandra Kurz Leaf Preparations on Embryonic Stages and Adult Snails of Biomphalaria glabrata (Say, 1818), Schistosoma mansoni Cercariae and Toxicity in Artemia salina
Source: MDPI journal article supplement (doi:10.3390/molecules27154993), 2022-08-05

## Supplementary Materials

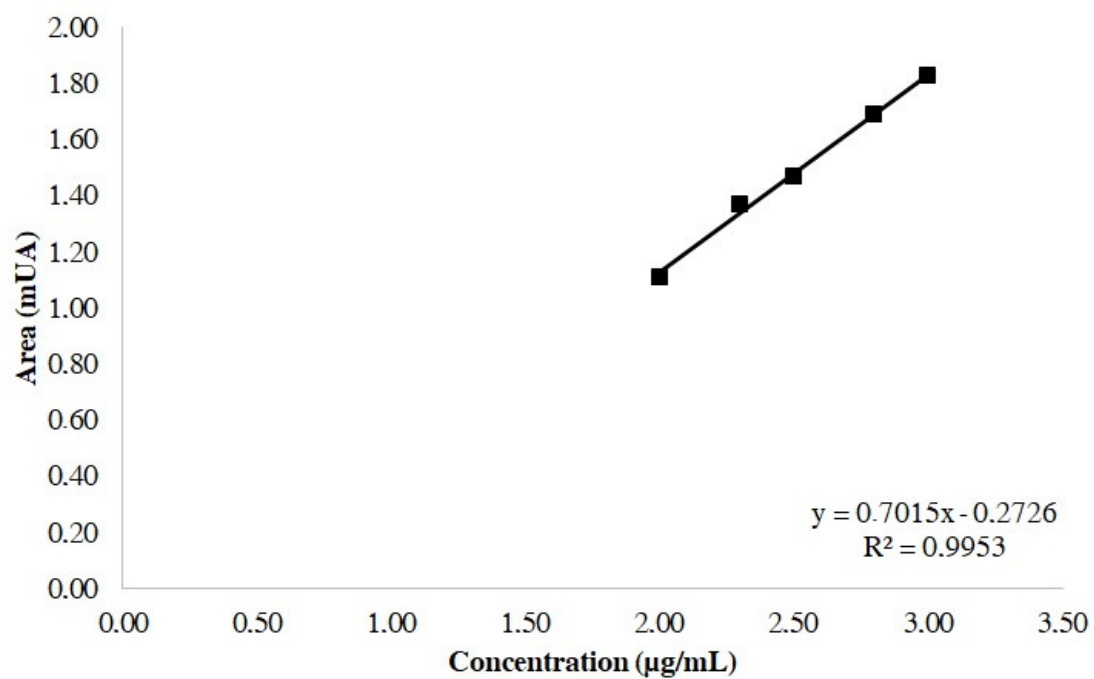

**Figure S1.** Calibration curve obtained for standard rutin.

Supplement: s1 [file s1]
